# Supplementary material for: Cost of Illness Analysis of Invasive Meningococcal Disease Caused by Neisseria Meningitidis Serogroup B in the Netherlands—a Holistic Approach
Source: Springer Nature journal article supplement (doi:10.1007/s40121-023-00903-0), 2024-02-16
Supplement: MOESM1 [file 26741840]

# The Cost of Illness of Invasive Meningococcal Disease Caused by Neisseria Meningitidis Serogroup B in the Netherlands, a Holistic Approach.

## Appendix I. Supplementary Material

|                                                                                                                                                                          |           |
|--------------------------------------------------------------------------------------------------------------------------------------------------------------------------|-----------|
| <b>METHODS</b> .....                                                                                                                                                     | <b>2</b>  |
| <b>Table S1.</b> Consumer price index in the Netherlands <sup>1</sup> .....                                                                                              | 2         |
| <b>Table S2.</b> Direct costs of the acute phase of invasive meningococcal disease and sequelae in the first year (1st year) and the subsequent years (2nd+ year). ..... | 3         |
| <b>Table S3.</b> Parameters of the acute phase of invasive meningococcal disease .....                                                                                   | 5         |
| <b>Table S4.</b> Description of direct medical cost estimated per sequela.....                                                                                           | 6         |
| <b>Table S5.</b> Annual special educational cost per sequelae and age.....                                                                                               | 9         |
| <b>Table S6.</b> Days of productivity loss due to premature mortality .....                                                                                              | 10        |
| <b>Table S7.</b> Percentage of productivity loss due to sequelae .....                                                                                                   | 11        |
| <b>Table S8.</b> Parameters included in the sensitivity analysis.....                                                                                                    | 12        |
| <b>Table S9.</b> Scenarios included in the sensitivity analysis .....                                                                                                    | 13        |
| <b>Table S10.</b> Direct medical cost related to sequelae in the first and following years recalculated to Dutch setting using purchasing power parity (PPP). .....      | 14        |
| <b>RESULTS</b> .....                                                                                                                                                     | <b>15</b> |
| <b>Figure S1.</b> Graphical Abstract .....                                                                                                                               | 15        |
| <b>Figure S2.</b> Average number of MenB-related invasive meningococcal disease cases and deaths by age. ....                                                            | 15        |
| <b>Figure S3.</b> Total direct cost by age group .....                                                                                                                   | 16        |
| <b>Table S11.</b> Epidemiology and costs (direct and indirect) of the acute phase and sequelae of invasive meningococcal disease per age group .....                     | 17        |
| <b>Table S12.</b> Number of cases and costs (direct and indirect) by sequelae type. ....                                                                                 | 18        |
| <b>Table S13.</b> Number of cases per sequelae type by age group .....                                                                                                   | 19        |
| <b>Table S14.</b> Direct cost per sequelae type and age group.....                                                                                                       | 20        |
| <b>REFERENCES</b> .....                                                                                                                                                  | <b>21</b> |

## METHODS

**Table S1.** Consumer price index in the Netherlands<sup>1</sup>

| <b>Year</b> | <b>CPI</b> | <b>CPI<br/>Multiplier</b> |
|-------------|------------|---------------------------|
| <b>2000</b> | 75.06      | 1.471                     |
| <b>2001</b> | 78.17      | 1.412                     |
| <b>2002</b> | 80.74      | 1.367                     |
| <b>2003</b> | 82.43      | 1.339                     |
| <b>2004</b> | 83.48      | 1.322                     |
| <b>2005</b> | 84.88      | 1.301                     |
| <b>2006</b> | 85.82      | 1.286                     |
| <b>2007</b> | 87.20      | 1.266                     |
| <b>2008</b> | 89.37      | 1.235                     |
| <b>2009</b> | 90.44      | 1.221                     |
| <b>2010</b> | 91.59      | 1.205                     |
| <b>2011</b> | 93.73      | 1.178                     |
| <b>2012</b> | 96.04      | 1.149                     |
| <b>2013</b> | 98.44      | 1.121                     |
| <b>2014</b> | 99.40      | 1.111                     |
| <b>2015</b> | 100.00     | 1.104                     |
| <b>2016</b> | 100.32     | 1.100                     |
| <b>2017</b> | 101.70     | 1.085                     |
| <b>2018</b> | 103.44     | 1.067                     |
| <b>2019</b> | 106.16     | 1.040                     |
| <b>2020</b> | 107.51     | 1.027                     |

Notes: 2015=100

Abbreviations: CPI, consumer price index.

**Table S2.** Direct costs of the acute phase of invasive meningococcal disease and sequelae in the first year (1st year) and the subsequent years (2nd+ year).

|                                                 | Base case | Costs 1 <sup>st</sup> year |             | Costs 2 <sup>nd</sup> + year |             |             | Distribution |
|-------------------------------------------------|-----------|----------------------------|-------------|------------------------------|-------------|-------------|--------------|
|                                                 |           | Lower value                | Upper value | Base case                    | Lower value | Upper value |              |
| <b>IMD Acute phase</b>                          |           |                            |             |                              |             |             |              |
| <i>Healthcare costs<sup>a</sup></i>             |           |                            |             |                              |             |             |              |
| 0–6 m                                           | €10,928   | €7,223                     | €15,571     | -                            | -           | -           | Gamma        |
| 6–24 m                                          | €8,727    | €6,819                     | €13,351     | -                            | -           | -           | Gamma        |
| 2–4 y                                           | €8,727    | €7,223                     | €12,543     | -                            | -           | -           | Gamma        |
| 5–9 y                                           | €8,031    | €7,223                     | €10,231     | -                            | -           | -           | Gamma        |
| 10–19 y                                         | €8,727    | €7,223                     | €12,432     | -                            | -           | -           | Gamma        |
| 20–64 y                                         | €9,332    | €6,939                     | €12,534     | -                            | -           | -           | Gamma        |
| ≥65 y                                           | €13,621   | €5,088                     | €20,538     | -                            | -           | -           | Gamma        |
| <i>Public health response costs<sup>b</sup></i> | €175.70   | SD: 35                     |             |                              |             |             | Gamma        |
| <b>Sequelae<sup>c</sup></b>                     |           |                            |             |                              |             |             |              |
| <i>Hearing loss</i>                             |           |                            |             |                              |             |             |              |
| Cochlear implant                                | €46,018   | €36,815                    | €55,222     | €3,574                       | €1,255      | €5,893      | Gamma        |
| Moderate bilateral                              | €2,960    | €2,368                     | €3,552      | €225                         | €180        | €270        | Gamma        |
| Moderate unilateral                             | €989      | €791                       | €1,187      | €157                         | €125        | €188        | Gamma        |
| <i>Neurological disability</i>                  |           |                            |             |                              |             |             |              |
| Severe neurological                             | €3,600    | €2,253                     | €4,947      | €570                         | €121        | €1,020      | Gamma        |
| Mental retardation / low IQ                     | €8,401    | €6,721                     | €10,081     | €8,401                       | €6,721      | €10,081     | Gamma        |
| Speech problems                                 | €4,106    | €3,285                     | €4,927      |                              | -           |             | Gamma        |
| Motor deficits                                  | €2,437    | €1,950                     | €2,925      | €1,394                       | €1,116      | €1,673      | Gamma        |
| <i>Limb amputation</i>                          | €74,473   | €66,069                    | €82,877     | €16,680                      | €13,344     | €20,017     | Gamma        |
| <i>Epilepsies / seizures</i>                    | €669      | €536                       | €803        | -                            | -           | -           | Gamma        |
| <i>Skin scarring</i>                            | €1,305    | €724                       | €1,886      | -                            | -           | -           | Gamma        |
| <i>Renal disease</i>                            | -         | -                          | -           | €146                         | €117        | €176        | Gamma        |
| <i>Blindness / severe visual impairment</i>     | €2,750    | €734                       | €4,767      | €2,750                       | €734        | €4,767      | Gamma        |

| <i>Psychological impairments</i> |        |        |        |        |        |        |       |
|----------------------------------|--------|--------|--------|--------|--------|--------|-------|
| ADHD                             | €5,113 | €4,091 | €6,136 | €5,113 | €4,091 | €6,136 | Gamma |
| Depression 18 y-                 | €76    | €60    | €91    | €76    | €60    | €91    | Gamma |
| Depression 18 y+                 | €655   | €524   | €786   | €655   | €524   | €786   | Gamma |
| Anxiety 18 y-                    | €76    | €60    | €91    | €76    | €60    | €91    | Gamma |
| Anxiety 18 y+                    | €432   | €346   | €519   | €432   | €346   | €519   | Gamma |
| Separation anxiety               | €76    | €60    | €91    | €76    | €60    | €91    | Gamma |

Notes: <sup>a</sup> IMD acute phase costs were calculated and include: costs for GP visit, hospitalisation and Intensive Care Unit. <sup>b</sup> Public health response costs were based on the assumption of Welte et al, 2004<sup>2</sup> and were updated with costs retrieved from KNMP kennisbank<sup>3</sup>; medicijnkosten<sup>4</sup>; and Hakkaart-van Roijen et al. 2016<sup>7</sup> .. <sup>c</sup>Sequelae costs were calculated as indicated in the Supplementary Material and include costs for inpatient and outpatient care, and rehabilitation.

Abbreviations: ADHD, attention deficit hyperactivity disorder; GP, general practitioner; IMD, invasive meningococcal disease; IQ, intelligence quotient; m, months; SD, standard deviation; y, years.

**Table S3.** Parameters of the acute phase of invasive meningococcal disease

| Parameters                                                           | Base case | Lower value | Upper value | Source                                              |
|----------------------------------------------------------------------|-----------|-------------|-------------|-----------------------------------------------------|
| <b>Number of GP Visits</b>                                           | 1         |             |             | Experts                                             |
| <b>Median stay at hospital by age (days)</b>                         |           |             |             |                                                     |
| 0–6 m                                                                | 11        | 8           | 15          |                                                     |
| 6–24 m                                                               | 9         | 8           | 11          |                                                     |
| 2–4 y                                                                | 9         | 8           | 11          |                                                     |
| 5–9 y                                                                | 8         | 8           | 10          | Stoof et al,<br>2015 <sup>5</sup>                   |
| 10–19 y                                                              | 9         | 8           | 12          |                                                     |
| 20–64 y                                                              | 13        | 10          | 16          |                                                     |
| ≥65 y                                                                | 15        | 6.5         | 23.5        |                                                     |
| All ages                                                             | 10        | 8           | 13          |                                                     |
| <b>Probability of ICU admission</b>                                  | 36.10%    |             |             | Loenenbach<br>et al, 2020 <sup>6</sup>              |
| <b>Median stay at ICU by age (days)</b>                              |           |             |             |                                                     |
| 0–6 m                                                                | 4         | 2           | 6.3         |                                                     |
| 6–24 m                                                               | 3         | 1.5         | 7           |                                                     |
| 2–4 y                                                                | 3         | 2           | 6           |                                                     |
| 5–9 y                                                                | 3         | 2           | 4           | Stoof et al,<br>2015 <sup>5</sup>                   |
| 10–19 y                                                              | 3         | 2           | 5           |                                                     |
| 20–64 y                                                              | 3         | 2           | 5           |                                                     |
| ≥65 y                                                                | 7         | 2           | 10          |                                                     |
| All ages                                                             | 3         | 2           | 5           |                                                     |
| <b>Number of follow-up visits for survivors<br/>without sequelae</b> | 1         |             |             | Expert                                              |
| <b>Direct medical costs (2021)</b>                                   |           |             |             | Hakkaart-<br>van Roijen et<br>al, 2016 <sup>7</sup> |
| GP visit                                                             | €36.65    |             |             |                                                     |
| Hospital admission (price per day)                                   |           |             |             |                                                     |
| General hospital                                                     | €528.63   |             |             |                                                     |
| University hospital                                                  | €696.32   |             |             |                                                     |
| Nursing day in ICU (including diagnostics +<br>medication)           | €2,237.79 |             |             |                                                     |
| Follow-up visit                                                      |           |             |             |                                                     |
| Paediatrician                                                        | €112.17   |             |             |                                                     |
| Neurologist                                                          | €109.95   |             |             |                                                     |

Abbreviations: GP, general practitioner; ICU, intensive care unit; IMD, invasive meningococcal disease; m, months; SD, standard deviation; y, years.

**Table S4.** Description of direct medical cost estimated per sequela.

| <b>Sequelae</b>                | <b>Description</b>                                                                                                                                                                                                                                                                                                                                                                                                                                                                                                                                |
|--------------------------------|---------------------------------------------------------------------------------------------------------------------------------------------------------------------------------------------------------------------------------------------------------------------------------------------------------------------------------------------------------------------------------------------------------------------------------------------------------------------------------------------------------------------------------------------------|
| <i>Hearing loss</i>            |                                                                                                                                                                                                                                                                                                                                                                                                                                                                                                                                                   |
| Cochlear implant               | <p>The first year, a similar approach as Pouwels et al<sup>8</sup> was applied using DBC costs to implantation (DBC-code 089999036) and rehabilitation (DBC-code 089999101).</p> <p>The following years, cost estimates by Beck et al<sup>9</sup> were applied and include: audiological assessment costs, maintenance costs of the cochlear implant and costs of 3 years of rehabilitation therapy.<sup>10</sup></p> <p>This approach includes only one cochlear implant, additional costs for maintenance or replacement were not included.</p> |
| Moderate unilateral            | Costs were obtained from Linssen et al <sup>11</sup> and include: costs of two Ear Nose Throat consultations, a hearing aid, and annual costs for batteries, maintenance, and aftercare of the hearing aid. <sup>7</sup>                                                                                                                                                                                                                                                                                                                          |
| Moderate bilateral             | Costs were calculated as for unilateral hearing loss. <sup>7,11</sup> However, cost items were multiplied by two (i.e., hearing aid, batteries, maintenance, and aftercare). Rehabilitation therapy was included (i.e., speech and language therapy), during the first year as patients were expected to quickly develop accustomed to moderate hearing loss.                                                                                                                                                                                     |
| <i>Neurological disability</i> |                                                                                                                                                                                                                                                                                                                                                                                                                                                                                                                                                   |
| Severe neurological            | Costs were obtained from two economic studies by Scholz et al <sup>12</sup> and Beck et al. <sup>9</sup> Mean average costs were converted to Dutch price levels using the purchasing power parities. <sup>13</sup>                                                                                                                                                                                                                                                                                                                               |
| Mental retardation / low IQ    | Direct medical costs were obtained from Olesen et al. <sup>14</sup>                                                                                                                                                                                                                                                                                                                                                                                                                                                                               |
| Speech problems                | Costs were calculated based on Beecham et al findings. <sup>15</sup> Forty-eight speech and communication therapist visits and 24 occupational therapist visits were assumed during the first year. The costs per speech therapist or occupational therapist visit were obtained from the Dutch Costing Manual. <sup>7</sup>                                                                                                                                                                                                                      |
| Motor deficits                 | Costs were calculated based on Beck et al approach. <sup>9</sup> Four sessions with a rehabilitation therapist and 40 sessions with a physiotherapist were assumed in the first year <sup>15</sup> . The contact with a therapist was assumed to last throughout childhood, however, based on a study of Wright et al, <sup>16</sup> the number of visits is reduced by 40% in the subsequent years to 2 rehabilitation visits and 24 physiotherapy visits.                                                                                       |
| <i>Limb amputation</i>         |                                                                                                                                                                                                                                                                                                                                                                                                                                                                                                                                                   |
|                                | First year costs were derived from previously published cost-effectiveness analyses <sup>8,17</sup> which assumed that all survivors with amputation required hospitalization within a few weeks for treatment of amputations. Rehabilitation costs were derived from Visser et al, <sup>18</sup> in which the follow-up cost in the first year include costs for rehabilitation, prosthesis, adjustment to the house, domiciliary care and admission to a                                                                                        |

|                                             |                                                                                                                                                                                                                                                                                                                                                                                                                                                                                                                                                                                                                                                                                                                          |
|---------------------------------------------|--------------------------------------------------------------------------------------------------------------------------------------------------------------------------------------------------------------------------------------------------------------------------------------------------------------------------------------------------------------------------------------------------------------------------------------------------------------------------------------------------------------------------------------------------------------------------------------------------------------------------------------------------------------------------------------------------------------------------|
|                                             | nursing home due to amputation of the limb. In the following years, follow-up costs include maintenance of prosthesis, domiciliary care, and admission to a nursing home.                                                                                                                                                                                                                                                                                                                                                                                                                                                                                                                                                |
| <i>Epilepsies / seizures</i>                | Seizures were assumed to only occur in the IMD acute phase. Treatment costs included: medication and biannual monitoring for the first two years (because children who remain free of symptoms after taking medication for 1–2 years can safely discontinue their medication). Resource use was based on an expert opinion (i.e., neurologist specialized in children). Costs for medical treatment <sup>19</sup> and neurologist visits <sup>7</sup> were obtained from literature.                                                                                                                                                                                                                                     |
| <i>Skin scarring</i>                        | First year costs were derived from previously published cost-effectiveness analyses, <sup>8,17</sup> which assume that 33% of IMD survivors with scars needed to be hospitalized again for their treatment. Depending on the severity, the patient is treated by a rehabilitation therapist once every 3 months for severe complication (Expert opinion from Advisory board with MenB experts). For the base case, the average resource use was included. The costs related to skin scarring were only assumed in the first year. No costs for plastic surgery due to scars were included.                                                                                                                               |
| <i>Renal disease</i>                        | During the first year, no additional costs were assumed as were already included in the IMD acute phase cost. <sup>3</sup> Based on a study by Buysse et al, <sup>20</sup> we assumed that 6% would develop chronic kidney disease. The weighted average of the treatment costs for chronic kidney disease (CKD) stage 1–4 was obtained from Vekeman et al <sup>21</sup> and include dialysis, medication, outpatient care, and inpatient care such as surgery, non-surgical procedures, scans.                                                                                                                                                                                                                          |
| <i>Blindness / severe visual impairment</i> | Costs are based on two economic studies by Scholz et al <sup>12</sup> and Beck et al <sup>9</sup> Mean average costs were converted to Dutch price levels for 2020 using the purchasing power parities. <sup>13</sup>                                                                                                                                                                                                                                                                                                                                                                                                                                                                                                    |
| <i>Psychological impairments</i>            |                                                                                                                                                                                                                                                                                                                                                                                                                                                                                                                                                                                                                                                                                                                          |
| ADHD                                        | Costs in children 8–18 years included: doctor’s consultation (i.e., consultation at the GP, psychologist, medical specialist, physiotherapist, occupational therapist, speech therapist and alternative therapy), training, day-care treatment, hospitalization, medication, and diet. <sup>22</sup> An average duration of 10 years of treatment was assumed. <sup>22</sup>                                                                                                                                                                                                                                                                                                                                             |
| Depression, anxiety and separation anxiety. | We assumed that 4% of the children with anxiety or depression were referred for treatment. <sup>23</sup> Anxiety costs were derived from Bodden et al. <sup>23</sup> Direct medical costs include doctor’s consultations (i.e., psychologist, psychiatrist and GP), anxiety medication, pharmacists fee and institutionalized treatment. <sup>23</sup> Separation anxiety is only included until the age of 12 years. <sup>24</sup> Depression costs for children were assumed to be the same as anxiety costs. <sup>23</sup><br>For adults, 66% seek professional care. <sup>25</sup> Costs for anxiety were derived from Smit et al. <sup>26</sup> Costs for depression were derived from Bosmans et al. <sup>27</sup> |

Direct cost includes doctor's consultations (i.e., GP, physical therapy, mental health care), dietician visits, and medication. Estimated costs for anxiety and depression are not specific for IMD.

---

Abbreviations: ADHD, attention deficit hyperactivity disorder; DBC, Diagnose Behandelings Combinatie (dutch); GP, general practitioner; IQ, intelligence quotient; IMD, invasive meningococcal disease.



**Table S5.** Annual special educational cost per sequelae and age

| <b>Age (years)</b> | <b>Cochlear implant<sup>28</sup></b> | <b>Severe neurological<sup>29</sup></b> | <b>Mental retardation / low IQ<sup>29</sup></b> | <b>Motor deficits<sup>29</sup></b> | <b>Limb amputation<sup>29</sup></b> | <b>Blindness / severe visual impairment<sup>28</sup></b> | <b>ADHD<sup>22</sup></b> |
|--------------------|--------------------------------------|-----------------------------------------|-------------------------------------------------|------------------------------------|-------------------------------------|----------------------------------------------------------|--------------------------|
| 4                  | €1,515                               | €12,962                                 | €5,832                                          | €8,563                             | €8,563                              | € 1,515                                                  | €2,701                   |
| 5                  | €1,515                               | €12,962                                 | €5,832                                          | €8,563                             | €8,563                              | € 1,515                                                  | €2,701                   |
| 6                  | €1,900                               | €12,962                                 | €5,832                                          | €8,563                             | €8,563                              | € 1,900                                                  | €2,701                   |
| 7                  | €1,515                               | €12,962                                 | €5,832                                          | €8,563                             | €8,563                              | € 1,515                                                  | €2,701                   |
| 8                  | €1,515                               | €13,633                                 | €5,416                                          | €9,281                             | €9,281                              | € 1,515                                                  | €2,701                   |
| 9                  | €1,515                               | €13,633                                 | €5,416                                          | €9,281                             | €9,281                              | € 1,515                                                  | €2,701                   |
| 10                 | €1,515                               | €13,633                                 | €5,416                                          | €9,281                             | €9,281                              | € 1,515                                                  | €2,701                   |
| 11                 | €1,515                               | €12,677                                 | €5,416                                          | €9,281                             | €9,281                              | € 1,515                                                  | €2,701                   |
| 12–18              | €1,540                               | €12,677                                 | €5,884                                          | €10,264                            | €10,264                             | € 1,540                                                  | €2,701                   |

Abbreviations: ADHD, attention deficit hyperactivity disorder; IQ, intelligence quotient.

**Table S6.** Days of productivity loss due to premature mortality

|                            |          | Base case <sup>5</sup> |         | SD  | Distribution | Scenario 4 <sup>2</sup> |         |
|----------------------------|----------|------------------------|---------|-----|--------------|-------------------------|---------|
| No. Days productivity loss |          | Children               | Parents |     |              | Children                | Parents |
|                            | 0–6 m    |                        | 11      | 2.2 | gamma        |                         | 3.32    |
|                            | 6–24 m   |                        | 9       | 1.8 |              |                         | 3.32    |
|                            | 2–4 y    |                        | 9       | 1.8 |              |                         | 3.32    |
|                            | 5–9 y    |                        | 8       | 1.6 |              |                         | 3.32    |
|                            | 10–14 y  |                        | 9       | 1.8 |              |                         | 3.32    |
|                            | 15–19 y  | 9                      |         | 1.8 |              | 18.87                   |         |
|                            | 20–64 y  | 13                     |         | 2.6 |              | 18.87                   |         |
|                            | ≥65 y    | 15                     |         | 3.0 |              | 18.87                   |         |
|                            | All ages | 10                     |         | 2.0 |              | 18.87                   |         |

Note: Scenario 4 refers to Welte et al<sup>2</sup> approach for the number of days of productivity loss of the patient or parent due to the IMD acute phase as shown in Table S9.

Abbreviations: IMD, invasive meningococcal disease; m, months; SD, standard deviation; y, years.

**Table S7.** Percentage of productivity loss due to sequelae

| <b>Sequelae</b>                             | <b>Productivity loss (%)<br/>Base case <sup>a</sup></b> | <b>SD</b> | <b>Source</b>                                     |
|---------------------------------------------|---------------------------------------------------------|-----------|---------------------------------------------------|
| <b>Hearing loss</b>                         |                                                         |           |                                                   |
| Cochlear implant                            | 46.50%                                                  | 0.2488    | Dutch Public health and health care <sup>30</sup> |
| Moderate bilateral                          | 27.0%                                                   | 0.1971    | Scholz et al, 2019 <sup>12</sup>                  |
| Moderate unilateral                         | 29.00%                                                  | 0.2059    |                                                   |
| <b>Neurological disability</b>              |                                                         |           |                                                   |
| Severe neurological                         | 46.50%                                                  | 0.2488    | Scholz et al, 2019 <sup>12</sup>                  |
| Mental retardation / low IQ                 | 18.70%                                                  | 0.1520    | Dutch Public health and health care <sup>30</sup> |
| Speech problems                             | 27.00%                                                  | 0.1971    | Scholz et al, 2019 <sup>12</sup>                  |
| Motor deficits                              | 46.50%                                                  | 0.2488    | Dutch Public health and health care <sup>30</sup> |
| <b>Limb amputation</b>                      | 46.50%                                                  | 0.2488    | Dutch Public health and health care <sup>30</sup> |
| <b>Epilepsies / seizures</b>                | 0%                                                      | -         |                                                   |
| <b>Skin scarring</b>                        | 16.00%                                                  | 0.1344    | Scholz et al, 2019 <sup>12</sup>                  |
| <b>Renal disease<sup>b</sup></b>            | 52.00%                                                  | 0.2496    |                                                   |
| <b>Blindness / severe visual impairment</b> | 46.50%                                                  | 0.2488    | Dutch Public health and health care <sup>30</sup> |
| <b>Psychological impairments</b>            |                                                         |           |                                                   |
| ADHD                                        | 38.00%                                                  | 0.2356    | Scholz et al, 2019 <sup>12</sup>                  |
| Depression                                  | 38.00%                                                  | 0.2356    |                                                   |
| Anxiety                                     | 38.00%                                                  | 0.2356    |                                                   |
| Separation anxiety <sup>c</sup>             | 0%                                                      | -         |                                                   |

Notes: <sup>a</sup> Distribution beta, <sup>b</sup> The productivity loss only applies to 6% (one of the 16 patients) of the patients with renal disease due to chronic kidney diseases<sup>12</sup>, <sup>c</sup> Until 12 years of age.

Abbreviations: ADHD, attention deficit hyperactivity disorder; IQ, intelligence quotient; SD, standard deviation.

**Table S8.** Parameters included in the sensitivity analysis

| <b>Parameters</b>                                 | <b>Variation</b> | <b>Base value</b> | <b>Lower bound</b> | <b>Upper bound</b> |
|---------------------------------------------------|------------------|-------------------|--------------------|--------------------|
| MenB-related IMD cases                            | +/- 25%          |                   | Age dependent      |                    |
| Case fatality rate                                | +/-20%           |                   | Age dependent      |                    |
| Age at first child (years) <sup>31</sup>          | +/-25%           | 29.9              | 22                 | 37                 |
| Percentage long-term care <sup>17,32</sup>        | Low/high value   | 25%               | 0% †               | 50% †              |
| Percentage special education need <sup>8,17</sup> | Low/high value   | 50%               | 0% ‡               | 100% ‡             |

Abbreviations: MenB-related IMD, *Neisseria meningitis* serogroup B invasive meningococcal disease.

† Assumption: None or all survivors need long-term care, respectively.

‡ Assumption: Non or all survivors need special education, respectively.

**Table S9.** Scenarios included in the sensitivity analysis

|                                                                                     |                                                                                                                                                                                                                                                                                                                                                |
|-------------------------------------------------------------------------------------|------------------------------------------------------------------------------------------------------------------------------------------------------------------------------------------------------------------------------------------------------------------------------------------------------------------------------------------------|
| <b>Scenario 1:</b><br>Direct medical costs                                          | Cost data from Scholz et al <sup>12</sup> was applied for the direct medical costs of the sequelae, in which the costs were adapted using cost conversion methods (i.e., purchasing power parities). <sup>13</sup> Costs are shown in Table 3.                                                                                                 |
| <b>Scenario 2:</b><br>Direct medical costs                                          | Cost data from Beck et al <sup>9</sup> was applied for the direct medical costs of the sequelae, in which the costs were adapted using cost conversion methods (i.e., purchasing power parities). <sup>13</sup> Costs are shown in Table 3                                                                                                     |
| <b>Scenario 3:</b><br>Public health response and outbreak management costs          | The public health response and outbreak management cost found in Scholz et al <sup>12</sup> were applied using purchasing power parities. <sup>13</sup> These costs included post-exposure prophylactic antibiotic treatment with rifampicin or ceftriaxone of close contacts, GP visits, and costs for local public health authorities.       |
| <b>Scenario 4:</b><br>Productivity losses during hospitalization of the acute phase | Welte et al <sup>2</sup> approach was used for the number of days of productivity loss of the patient or parent due to the IMD acute phase. For patients younger than 15 years of age, 3.32 days of work loss were assigned to one parent. For patients older than 15 years, 18.87 days of work loss were assumed by the patient. <sup>2</sup> |
| <b>Scenario 5:</b><br>Informal long-term care                                       | It was assumed that 10% of the IMD patients with severe sequelae needed a lifelong caregiver, with none of the patients' needs institutional care. <sup>12</sup> The costs were estimated using the Dutch Costing manual and we assumed that on average, 9.9 hours of informal care was provided per week. <sup>7,33</sup>                     |
| <b>Scenario 6:</b><br>Informal long-term care                                       | It was assumed that 10% of all IMD patients with a sequelae needed a lifelong caregiver, with none of the patients' needs institutional care. <sup>12</sup> The costs were estimated using the Dutch Costing manual and we assumed that on average, 9.9 hours of informal care was provided per week. <sup>7,33</sup>                          |
| <b>Scenario 7:</b><br>Sequelae probabilities                                        | Probabilities of psychological impairments, i.e., ADHD, anxiety and separation anxiety, were excluded.                                                                                                                                                                                                                                         |
| <b>Scenario 8:</b><br>Discounted costs                                              | Costs were not discounted.                                                                                                                                                                                                                                                                                                                     |
| <b>Scenario 9:</b><br>Discounted costs                                              | Costs were discounted with 1.5%.                                                                                                                                                                                                                                                                                                               |

Abbreviations: GP, general practitioner; ADHD, attention deficit hyperactivity disorder; IMD, invasive meningococcal disease.

**Table S10.** Direct medical cost related to sequelae in the first and following years

recalculated to Dutch setting using purchasing power parity (PPP).

|                                                               | Scholz et al <sup>12*^</sup> |             |             | Beck et al <sup>9*</sup> |             |             |
|---------------------------------------------------------------|------------------------------|-------------|-------------|--------------------------|-------------|-------------|
|                                                               | Mean                         | Lower bound | Upper bound | Mean                     | Lower bound | Upper bound |
| <b>Direct medical costs 1<sup>st</sup> year</b>               |                              |             |             |                          |             |             |
| <i>Hearing loss</i>                                           |                              |             |             |                          |             |             |
| Cochlear implant                                              | €47,535                      | €43,339     | €52,423     | €57,988                  | €40,591     | €75,384     |
| Moderate bilateral                                            | €2,954                       | €2,364      | €3,546      | €1,687                   | €1,181      | €2,193      |
| Moderate unilateral                                           | €2,954                       | €2,364      | €3,546      | € 452                    | € 317       | € 588       |
| <i>Neurological disability</i>                                |                              |             |             |                          |             |             |
| Severe neurological                                           | €2,253                       | €1,366      | €3,219      | €4,947                   | €3,807      | €11,077     |
| Mental retardation / low IQ                                   | €1,982                       | €1,138      | €2,893      | €8,017                   | €5,612      | €10,422     |
| Speech problems                                               | €1,901                       | €1,101      | €2,731      | €5,062                   | €3,543      | €6,581      |
| Motor deficits                                                | €481                         | €395        | €591        | €6,279                   | €3,768      | €8,163      |
| <i>Limp amputation</i>                                        | €12,884                      | €5,888      | €22,020     | €24,713                  | €17,299     | €32,127     |
| <i>Epilepsies / seizures</i>                                  | €4,484                       | -           | €11,587     | €2,590                   | €1,543      | €4,005      |
| <i>Skin scarring</i>                                          | €2,004                       | €452        | €4,600      | €2,951                   | €2,066      | €3,836      |
| <i>Renal disease</i>                                          | €10,073                      | €5,507      | €16,329     | €2,291                   | €1,886      | €5,325      |
| <i>Blindness / severe visual impairment</i>                   | €734                         | €587        | €881        | €4,767                   | €3,337      | €6,197      |
| <i>Psychological impairments</i>                              |                              |             |             |                          |             |             |
| ADHD                                                          | €1,522                       | €1,116      | €1,116      | €1,575                   | €1,331      | €1,868      |
| Depression                                                    | €459                         | -           | €2,314      | €149                     | €111        | €553        |
| Anxiety                                                       | €266                         | €219        | €317        | €149                     | €111        | €553        |
| Separation anxiety                                            | €2,461                       | €2,331      | €2,710      | €149                     | €111        | €553        |
| <b>Direct medical costs 2<sup>nd</sup> year and following</b> |                              |             |             |                          |             |             |
| <i>Hearing loss</i>                                           |                              |             |             |                          |             |             |
| Cochlear implant                                              | €1,255                       | €1,006      | €1,447      | €5,893                   | €4,125      | €7,661      |
| Moderate bilateral                                            | €1,329                       | €1,063      | €1,594      | €301                     | €210        | €391        |
| Moderate unilateral                                           | €1,329                       | €1,063      | €1,594      | €223                     | €156        | €290        |
| <i>Neurological disability</i>                                |                              |             |             |                          |             |             |
| Severe neurological                                           | €121                         | €54         | €242        | €1,020                   | €714        | €1,326      |
| Mental retardation/ low IQ                                    | €81                          | €37         | €161        | €8,017                   | €5,612      | €10,422     |
| Speech problems                                               | €41                          | €18         | €81         | -                        | -           | -           |
| Motor deficits                                                | €41                          | €18         | €81         | €3,768                   | €2,637      | €6,279      |
| <i>Limp amputation</i>                                        | €2,387                       | €470        | €6,086      | €1,633                   | €1,143      | €2,123      |
| <i>Epilepsies/ seizures</i>                                   | €4,484                       | -           | €11,587     | €2,590                   | €1,543      | €4,005      |
| <i>Skin scarring</i>                                          | €20                          | -           | €40         | -                        | -           | -           |
| <i>Renal disease</i>                                          | €4,211                       | €42         | €12,820     | €1,031                   | €834        | €1,943      |
| <i>Blindness/ severe visual impairment</i>                    | €734                         | €587        | €881        | €4,767                   | €3,337      | €6,197      |
| <i>Psychological impairments</i>                              |                              |             |             |                          |             |             |
| ADHD                                                          | € 1,522                      | € 1,116     | €1,116      | €1,575                   | €1,331      | €1,868      |
| Depression                                                    | € 459                        | -           |             | €149                     | €111        | €553        |
| Anxiety                                                       | € 266                        | € 219       | € 317       | €149                     | €111        | €553        |
| Separation anxiety                                            | € 25                         | € 18        | € 36        | €149                     | €111        | €553        |

Abbreviations: ADHD, attention deficit hyperactivity disorder; IQ, intelligence quotient. \*Recalculated using purchasing power parities (PPP) to Dutch setting. ^ based on 1 on 1 consultation.

# RESULTS

Figure S1. Graphical Abstract

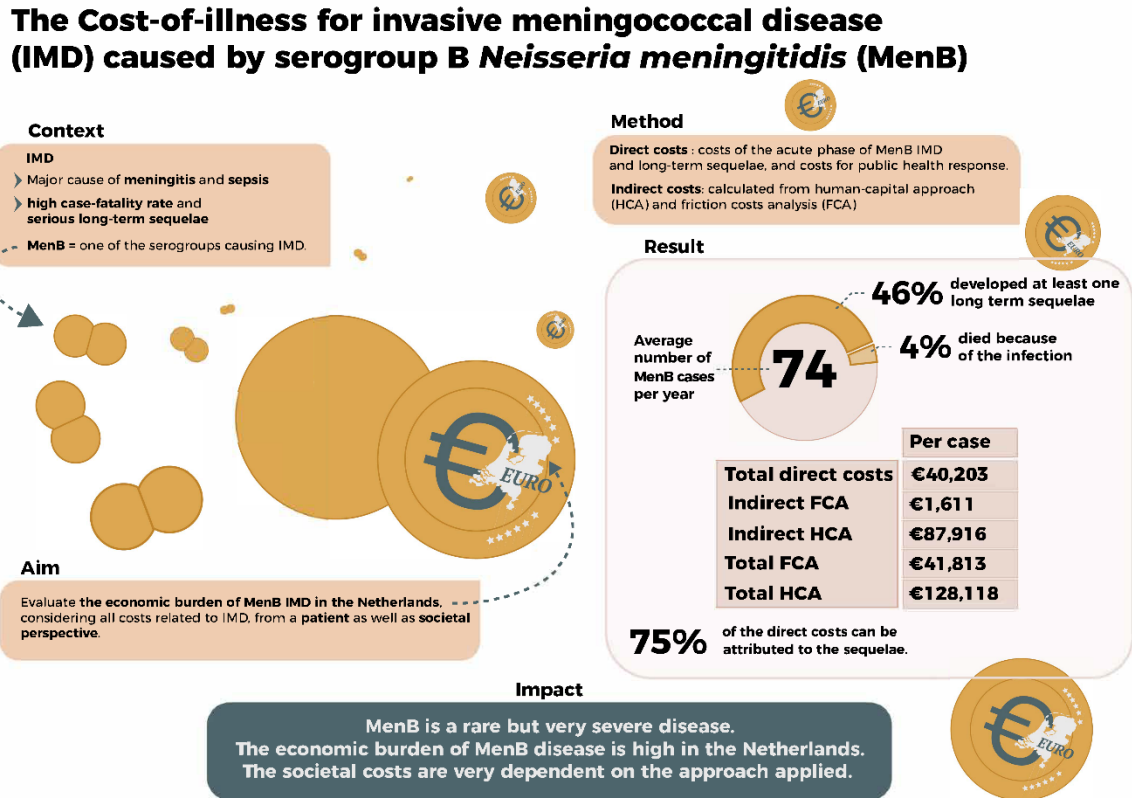

Figure S2. Average number of MenB-related invasive meningococcal disease cases and deaths by age.

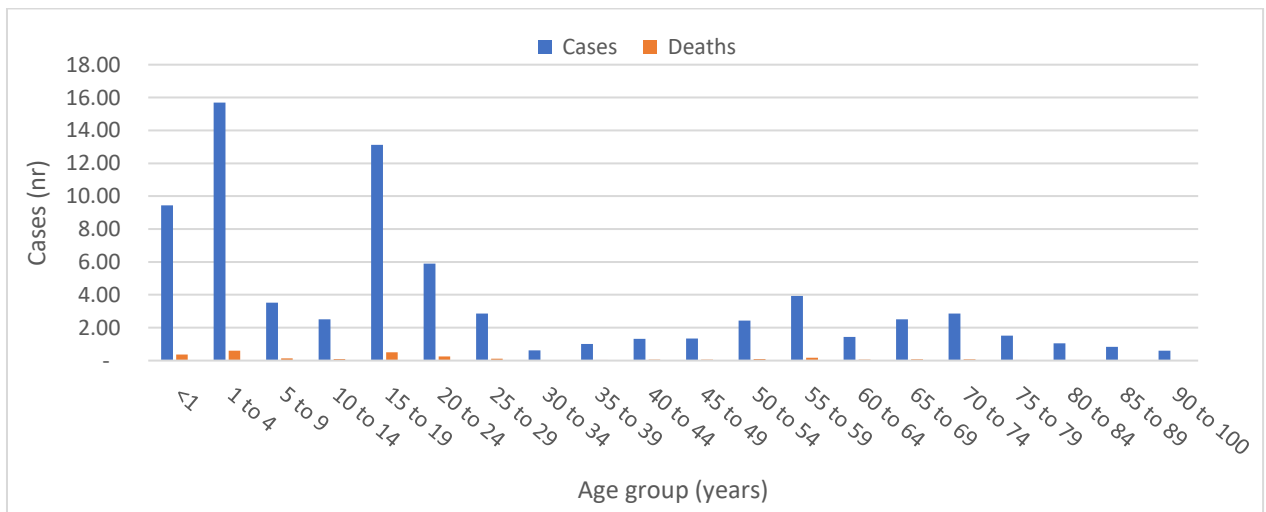

Abbreviations: MenB, *Neisseria meningitidis* serogroup B; IMD, invasive meningococcal disease; nr, number.

**Figure S3.** Total direct cost by age group

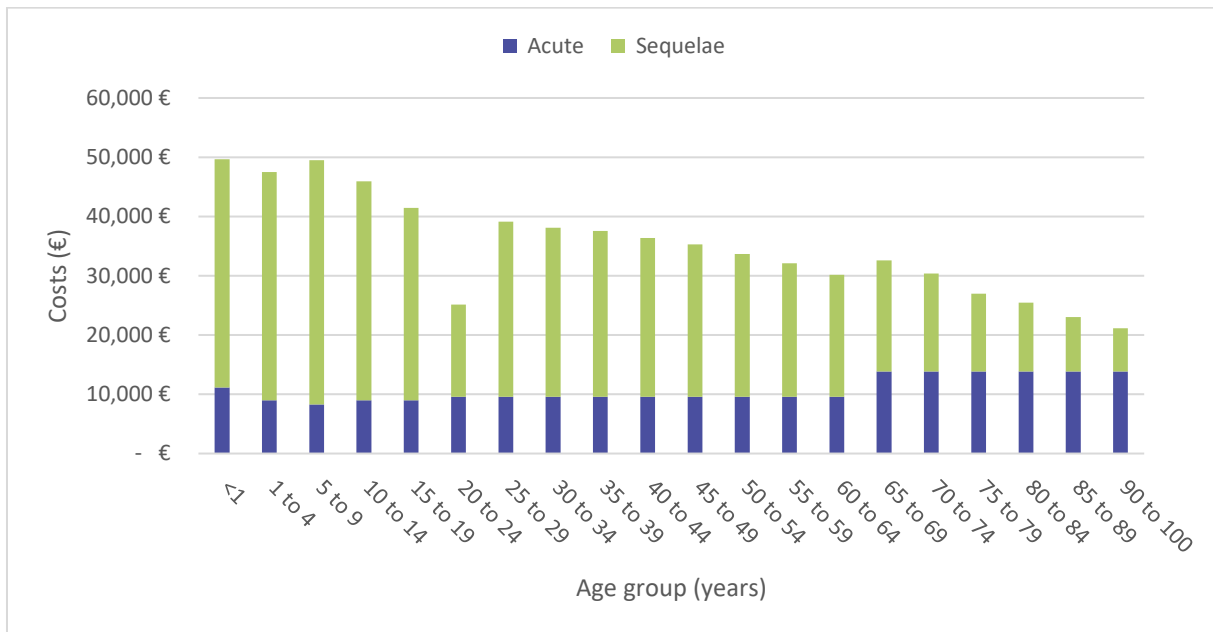



**Table S11.** Epidemiology and costs (direct and indirect) of the acute phase and sequelae of invasive meningococcal disease per age group

| Age group    | Epidemiology |            | IMD acute phase |                   |                |                   |               | Combined Sequelae |                   |                    |                |                   |                |
|--------------|--------------|------------|-----------------|-------------------|----------------|-------------------|---------------|-------------------|-------------------|--------------------|----------------|-------------------|----------------|
|              | Cases        | Deaths     | Direct costs    | Indirect costs    |                |                   |               | Cases             | Direct costs      | Indirect costs     |                |                   |                |
|              |              |            |                 | Productivity loss |                |                   |               |                   |                   | Productivity loss† |                |                   |                |
|              |              |            |                 | Acute phase       |                | Pre-mature deaths |               |                   |                   | Patients           |                | Parents           |                |
| HCA          | FCA          | HCA        | FCA             | HCA               | FCA            | HCA               | FCA           | HCA               | FCA               |                    |                |                   |                |
| <1           | 10           | 0.4        | €107,148        | €9,340            | €9,340         | €119,728          | €-            | 4.42              | €369,879          | €373,196           | €-             | €504,810          | €7,551         |
| 1-4          | 16           | 0.6        | €141,580        | €12,578           | €12,578        | €212,664          | €-            | 7.27              | €609,186          | €662,881           | €-             | €786,723          | €12,429        |
| 5-9          | 4            | 0.1        | €29,752         | €3,225            | €3,225         | €58,021           | €-            | 1.66              | €148,480          | €180,855           | €-             | €146,999          | €3,585         |
| 10-14        | 3            | 0.1        | €23,294         | €2,620            | €2,620         | €53,096           | €-            | 1.20              | €96,096           | €165,501           | €-             | €55,910           | €2,512         |
| 15-19        | 13           | 0.5        | €114,663        | €9,218            | €9,218         | €305,014          | €920          | 5.89              | €415,794          | €950,739           | €2,868         | €46,352           | €6,218         |
| 20-24        | 6            | 0.2        | €55,475         | €1,676            | €1,676         | €171,785          | €461          | 2.66              | €90,424           | €482,450           | €1,294         | €-                | €-             |
| 25-29        | 3            | 0.1        | €26,781         | €3,220            | €3,220         | €90,473           | €886          | 1.28              | €82,777           | €254,089           | €2,489         | €-                | €-             |
| 30-34        | 1            | 0.0        | €5,739          | €690              | €690           | €18,804           | €190          | 0.27              | €17,121           | €52,809            | €533           | €-                | €-             |
| 35-39        | 1            | 0.0        | €9,565          | €1,456            | €1,456         | €30,121           | €400          | 0.46              | €27,981           | €84,595            | €1,123         | €-                | €-             |
| 40-44        | 1            | 0.1        | €13,391         | €2,038            | €2,038         | €37,134           | €559          | 0.64              | €37,520           | €104,290           | €1,569         | €-                | €-             |
| 45-49        | 1            | 0.1        | €13,391         | €2,171            | €2,171         | €32,219           | €596          | 0.64              | €35,998           | €90,486            | €1,673         | €-                | €-             |
| 50-54        | 2            | 0.1        | €22,955         | €3,722            | €3,722         | €40,726           | €1,024        | 1.10              | €57,846           | €114,378           | €2,877         | €-                | €-             |
| 55-59        | 4            | 0.2        | €36,346         | €4,623            | €4,623         | €43,308           | €1,270        | 1.74              | €85,584           | €121,629           | €3,567         | €-                | €-             |
| 60-64        | 1            | 0.1        | €13,391         | €1,703            | €1,703         | €7,808            | €467          | 0.64              | €28,813           | €21,929            | €1,310         | €-                | €-             |
| 65-69        | 3            | 0.1        | €36,021         | €696              | €696           | €3,328            | €114          | 1.21              | €48,711           | €13,720            | €469           | €-                | €-             |
| 70-74        | 3            | 0.1        | €36,021         | €696              | €696           | €1,469            | €113          | 1.21              | €42,974           | €6,058             | €465           | €-                | €-             |
| 75-79        | 1            | 0.0        | €19,396         | €-                | €-             | €-                | €-            | 0.65              | €18,355           | €-                 | €-             | €-                | €-             |
| 80-84        | 1            | 0.0        | €13,854         | €-                | €-             | €-                | €-            | 0.46              | €11,611           | €-                 | €-             | €-                | €-             |
| 85-89        | 1            | 0.0        | €11,083         | €-                | €-             | €-                | €-            | 0.37              | €7,324            | €-                 | €-             | €-                | €-             |
| 90-100       | 1            | 0.0        | €8,312          | €-                | €-             | €-                | €-            | 0.28              | €4,365            | €-                 | €-             | €-                | €-             |
| <b>TOTAL</b> | <b>74</b>    | <b>2.8</b> | <b>€738,156</b> | <b>€59,671</b>    | <b>€57,644</b> | <b>€1,225,699</b> | <b>€6,999</b> | <b>34.1</b>       | <b>€2,236,841</b> | <b>€3,679,604</b>  | <b>€20,238</b> | <b>€1,540,794</b> | <b>€32,295</b> |

Abbreviations: IMD, invasive meningococcal disease; FCA, friction-cost approach; HCA, human-capital approach.

† Total indirect costs due to productivity loss for patients and parents together were €5,043,056 for HCA and €50,748 for FCA.

**Table S12.** Number of cases and costs (direct and indirect) by sequelae type.

|                                         | Number of cases | Direct cost       | Indirect costs    |                |                   |                |
|-----------------------------------------|-----------------|-------------------|-------------------|----------------|-------------------|----------------|
|                                         |                 |                   | Patients          |                | Parents           |                |
|                                         |                 |                   | HCA               | FCA            | HCA               | FCA            |
| <b><i>Hearing loss</i></b>              |                 |                   |                   |                |                   |                |
| Cochlear implant                        | 1.74            | €634,513          | €340,463          | €1,873         | €348,020          | €7,373         |
| Moderate bilateral                      | 2.71            | €19,939           | €306,618          | €1,686         | €53,979           | €1,144         |
| Moderate unilateral                     | 3.71            | €15,211           | €451,529          | €2,483         | €74,007           | €1,568         |
| <b><i>Neurological disability</i></b>   |                 |                   |                   |                |                   |                |
| Severe neurological                     | 0.73            | €200,851          | €141,744          | €780           | €144,890          | €3,070         |
| Mental retardation/low IQ               | 0.36            | €153,001          | €27,942           | €154           | €71,024           | €1,505         |
| Speech problems                         | 2.53            | €10,013           | €287,253          | €1,580         | €50,569           | €1,071         |
| Motor deficits                          | 1.09            | €302,351          | €212,615          | €1,169         | €217,335          | €4,605         |
| <b><i>Limb amputation</i></b>           | 0.90            | €595,745          | €175,095          | €963           | €178,981          | €3,792         |
| <b><i>Epilepsies / Seizures</i></b>     | 1.27            | €816              | –                 | –              | –                 | –              |
| <b><i>Skin scarring</i></b>             | 4.55            | €5,713            | €305,542          | €1,680         | €90,769           | €1,923         |
| <b><i>Renal disease</i></b>             | 1.46            | €4,298            | €19,911           | €110           | €1,820            | €39            |
| <b><i>Blindness</i></b>                 | 0.30            | €91,372           | €58,365           | €321           | €59,660           | €1,264         |
| <b><i>Psychological impairments</i></b> |                 |                   |                   |                |                   |                |
| ADHD                                    | 6.88            | €195,402          | €1,097,011        | €6,034         | €137,219          | €2,907         |
| Anxiety                                 | 1.60            | €6,459            | €255,515          | €1,405         | €31,961           | €677           |
| Separation anxiety                      | 4.24            | €1,157            | –                 | –              | €80,556           | €1,357         |
| <b>TOTAL</b>                            | <b>34.1</b>     | <b>€2,236,841</b> | <b>€3,679,604</b> | <b>€20,238</b> | <b>€1,540,794</b> | <b>€32,295</b> |

Abbreviations: ADHD, attention deficit hyperactivity disorder; FCA, friction-cost approach; HCA, human-capital approach; IQ, intelligence quotient.

**Table S13.** Number of cases per sequelae type by age group

| Age group     | <i>Hearing loss</i> |                    |                     | <i>Neurological disability</i> |                            |                 |                | <i>Limb amputation</i> | <i>Epilepsies/ seizures</i> | <i>Skin scarring</i> | <i>Renal disease</i> | <i>Blindness/ severe visual impairmen</i> | <i>Psychological impairments</i> |             |                    |
|---------------|---------------------|--------------------|---------------------|--------------------------------|----------------------------|-----------------|----------------|------------------------|-----------------------------|----------------------|----------------------|-------------------------------------------|----------------------------------|-------------|--------------------|
|               | Cochlear implant    | Moderate bilateral | Moderate unilateral | Severe                         | Mental retardation/ low IQ | Speech problems | Motor deficits |                        |                             |                      |                      |                                           | ADHD                             | Anxiety     | Separation anxiety |
| <b>&lt;1</b>  | 0.23                | 0.35               | 0.48                | 0.09                           | 0.05                       | 0.33            | 0.14           | 0.12                   | 0.16                        | 0.59                 | 0.19                 | 0.04                                      | 0.89                             | 0.21        | 0.55               |
| <b>1-4</b>    | 0.37                | 0.58               | 0.79                | 0.16                           | 0.08                       | 0.54            | 0.23           | 0.19                   | 0.27                        | 0.97                 | 0.31                 | 0.06                                      | 1.47                             | 0.34        | 0.91               |
| <b>5-9</b>    | 0.08                | 0.13               | 0.18                | 0.04                           | 0.02                       | 0.12            | 0.05           | 0.04                   | 0.06                        | 0.22                 | 0.07                 | 0.01                                      | 0.33                             | 0.08        | 0.21               |
| <b>10-14</b>  | 0.06                | 0.10               | 0.13                | 0.03                           | 0.01                       | 0.09            | 0.04           | 0.03                   | 0.04                        | 0.16                 | 0.05                 | 0.01                                      | 0.24                             | 0.06        | 0.15               |
| <b>15-19</b>  | 0.30                | 0.47               | 0.64                | 0.13                           | 0.06                       | 0.44            | 0.19           | 0.16                   | 0.22                        | 0.79                 | 0.25                 | 0.05                                      | 1.19                             | 0.28        | 0.73               |
| <b>20-24</b>  | 0.14                | 0.21               | 0.29                | 0.06                           | 0.03                       | 0.20            | 0.09           | 0.07                   | 0.10                        | 0.36                 | 0.11                 | 0.02                                      | 0.54                             | 0.13        | 0.33               |
| <b>25-29</b>  | 0.07                | 0.10               | 0.14                | 0.03                           | 0.01                       | 0.10            | 0.04           | 0.03                   | 0.05                        | 0.17                 | 0.05                 | 0.01                                      | 0.26                             | 0.06        | 0.16               |
| <b>30-34</b>  | 0.01                | 0.02               | 0.03                | 0.01                           | 0.00                       | 0.02            | 0.01           | 0.01                   | 0.01                        | 0.04                 | 0.01                 | 0.00                                      | 0.06                             | 0.01        | 0.03               |
| <b>35-39</b>  | 0.02                | 0.04               | 0.05                | 0.01                           | 0.00                       | 0.03            | 0.01           | 0.01                   | 0.02                        | 0.06                 | 0.02                 | 0.00                                      | 0.09                             | 0.02        | 0.06               |
| <b>40-44</b>  | 0.03                | 0.05               | 0.07                | 0.01                           | 0.01                       | 0.05            | 0.02           | 0.02                   | 0.02                        | 0.09                 | 0.03                 | 0.01                                      | 0.13                             | 0.03        | 0.08               |
| <b>45-49</b>  | 0.03                | 0.05               | 0.07                | 0.01                           | 0.01                       | 0.05            | 0.02           | 0.02                   | 0.02                        | 0.09                 | 0.03                 | 0.01                                      | 0.13                             | 0.03        | 0.08               |
| <b>50-54</b>  | 0.06                | 0.09               | 0.12                | 0.02                           | 0.01                       | 0.08            | 0.04           | 0.03                   | 0.04                        | 0.15                 | 0.05                 | 0.01                                      | 0.22                             | 0.05        | 0.14               |
| <b>55-59</b>  | 0.09                | 0.14               | 0.19                | 0.04                           | 0.02                       | 0.13            | 0.06           | 0.05                   | 0.06                        | 0.23                 | 0.07                 | 0.02                                      | 0.35                             | 0.08        | 0.22               |
| <b>60-64</b>  | 0.03                | 0.05               | 0.07                | 0.01                           | 0.01                       | 0.05            | 0.02           | 0.02                   | 0.02                        | 0.09                 | 0.03                 | 0.01                                      | 0.13                             | 0.03        | 0.08               |
| <b>65-69</b>  | 0.06                | 0.10               | 0.13                | 0.03                           | 0.01                       | 0.09            | 0.04           | 0.03                   | 0.04                        | 0.16                 | 0.05                 | 0.01                                      | 0.24                             | 0.06        | 0.15               |
| <b>70-74</b>  | 0.06                | 0.10               | 0.13                | 0.03                           | 0.01                       | 0.09            | 0.04           | 0.03                   | 0.04                        | 0.16                 | 0.05                 | 0.01                                      | 0.24                             | 0.06        | 0.15               |
| <b>75-79</b>  | 0.03                | 0.05               | 0.07                | 0.01                           | 0.01                       | 0.05            | 0.02           | 0.02                   | 0.02                        | 0.09                 | 0.03                 | 0.01                                      | 0.13                             | 0.03        | 0.08               |
| <b>80-84</b>  | 0.02                | 0.04               | 0.05                | 0.01                           | 0.00                       | 0.03            | 0.01           | 0.01                   | 0.02                        | 0.06                 | 0.02                 | 0.00                                      | 0.09                             | 0.02        | 0.06               |
| <b>85-89</b>  | 0.02                | 0.03               | 0.04                | 0.01                           | 0.00                       | 0.03            | 0.01           | 0.01                   | 0.01                        | 0.05                 | 0.02                 | 0.00                                      | 0.08                             | 0.02        | 0.05               |
| <b>90-100</b> | 0.01                | 0.02               | 0.03                | 0.01                           | 0.00                       | 0.02            | 0.01           | 0.01                   | 0.01                        | 0.04                 | 0.01                 | 0.00                                      | 0.06                             | 0.01        | 0.03               |
| <b>TOTAL</b>  | <b>1.74</b>         | <b>2.71</b>        | <b>3.71</b>         | <b>0.73</b>                    | <b>0.36</b>                | <b>2.53</b>     | <b>1.09</b>    | <b>0.90</b>            | <b>1.27</b>                 | <b>4.55</b>          | <b>1.46</b>          | <b>0.30</b>                               | <b>6.88</b>                      | <b>1.60</b> | <b>4.24</b>        |

Abbreviations: ADHD, attention deficit hyperactivity disorder; IQ, intelligence quotient.

**Table S14.** Direct cost per sequelae type and age group

| Age group    | Hearing loss     |                    |                     | Neurological disability |                            |                 |                 | Limb amputation | Epilepsies/ seizures | Skin scarring | Renal disease | Blindness/ severe visual impairment | Psychological impairments |               |                    |
|--------------|------------------|--------------------|---------------------|-------------------------|----------------------------|-----------------|-----------------|-----------------|----------------------|---------------|---------------|-------------------------------------|---------------------------|---------------|--------------------|
|              | Cochlear implant | Moderate bilateral | Moderate unilateral | Severe                  | Mental retardation/ low IQ | Speech problems | Motor deficits  |                 |                      |               |               |                                     | ADHD                      | Anxiety       | Separation anxiety |
| <1           | €96,190          | €2,933             | €2,285              | €29,260                 | €23,242                    | €1,350          | €46,520         | €89,378         | €110                 | €770          | €665          | €14,044                             | €62,309                   | €392          | €432               |
| 1-4          | €158,750         | €4,823             | €3,755              | €50,435                 | €38,711                    | €2,222          | €78,776         | €148,812        | €181                 | €1,268        | €1,094        | €23,192                             | €95,897                   | €645          | €626               |
| 5-9          | €37,112          | €1,093             | €850                | €15,523                 | €9,626                     | €506            | €21,924         | €37,043         | €41                  | €289          | €247          | €5,448                              | €18,541                   | €146          | €91                |
| 10-14        | €26,039          | €782               | €607                | €9,639                  | €6,565                     | €366            | €14,530         | €25,519         | €30                  | €209          | €176          | €3,807                              | €7,717                    | €104          | €8                 |
| 15-19        | €124,746         | €3,816             | €2,956              | €40,225                 | €30,452                    | €1,800          | €62,034         | €117,798        | €147                 | €1,027        | €854          | €18,163                             | €10,938                   | €837          | €0                 |
| 20-24        | €28,662          | €885               | €684                | €8,677                  | €6,894                     | €420            | €12,284         | €26,617         | €34                  | €240          | €197          | €4,164                              | €0                        | €667          | €0                 |
| 25-29        | €26,256          | €815               | €628                | €7,931                  | €6,302                     | €392            | €11,225         | €24,376         | €32                  | €224          | €180          | €3,806                              | €0                        | €610          | €0                 |
| 30-34        | €5,437           | €170               | €131                | €1,636                  | €1,300                     | €84             | €2,314          | €5,046          | €7                   | €48           | €37           | €785                                | €0                        | €126          | €0                 |
| 35-39        | €8,893           | €280               | €214                | €2,669                  | €2,122                     | €140            | €3,775          | €8,250          | €11                  | €80           | €61           | €1,281                              | €0                        | €206          | €0                 |
| 40-44        | €11,943          | €381               | €289                | €3,566                  | €2,836                     | €196            | €5,040          | €11,074         | €16                  | €112          | €81           | €1,710                              | €0                        | €275          | €0                 |
| 45-49        | €11,477          | €371               | €279                | €3,409                  | €2,711                     | €196            | €4,815          | €10,635         | €16                  | €112          | €77           | €1,635                              | €0                        | €263          | €0                 |
| 50-54        | €18,492          | €610               | €454                | €5,445                  | €4,333                     | €336            | €7,683          | €17,119         | €27                  | €192          | €123          | €2,610                              | €0                        | €422          | €0                 |
| 55-59        | €27,441          | €925               | €680                | €8,002                  | €6,370                     | €532            | €11,276         | €25,374         | €43                  | €304          | €181          | €3,834                              | €0                        | €622          | €0                 |
| 60-64        | €9,278           | €322               | €233                | €2,668                  | €2,125                     | €196            | €3,752          | €8,566          | €16                  | €112          | €60           | €1,277                              | €0                        | €208          | €0                 |
| 65-69        | €15,772          | €569               | €403                | €4,451                  | €3,550                     | €369            | €6,246          | €14,531         | €30                  | €211          | €100          | €2,129                              | €0                        | €349          | €0                 |
| 70-74        | €14,016          | €531               | €366                | €3,859                  | €3,082                     | €369            | €5,397          | €12,879         | €30                  | €211          | €87           | €1,844                              | €0                        | €305          | €0                 |
| 75-79        | €6,082           | €253               | €166                | €1,584                  | €1,269                     | €199            | €2,198          | €5,556          | €16                  | €113          | €35           | €755                                | €0                        | €127          | €0                 |
| 80-84        | €3,885           | €171               | €109                | €976                    | €784                       | €142            | €1,348          | €3,537          | €12                  | €81           | €22           | €465                                | €0                        | €80           | €0                 |
| 85-89        | €2,507           | €123               | €74                 | €578                    | €467                       | €114            | €788            | €2,264          | €9                   | €65           | €13           | €274                                | €0                        | €49           | €0                 |
| 90-100       | €1,535           | €85                | €49                 | €317                    | €258                       | €85             | €424            | €1,373          | €7                   | €49           | €7            | €149                                | €0                        | €28           | €0                 |
| <b>TOTAL</b> | <b>€634,513</b>  | <b>€19,939</b>     | <b>€15,211</b>      | <b>€200,851</b>         | <b>€153,001</b>            | <b>€10,013</b>  | <b>€302,351</b> | <b>€595,745</b> | <b>€816</b>          | <b>€5,713</b> | <b>€4,298</b> | <b>€91,372</b>                      | <b>€195,402</b>           | <b>€6,459</b> | <b>€1,157</b>      |

Abbreviations: ADHD, attention deficit hyperactivity disorder; IQ, intelligence quotient.

## REFERENCES

1. Consumentenprijzen; prijsindex 2015=100. 2021 Centraal Bureau voor de Statistiek (CBS) Statline; Available from <https://statline.cbs.nl/Statweb/publication/?DM=SLNL&PA=83131NED>. Accessed October 21, 2021.
2. Welte R, van den Dobbelsteen G, Bos JM, et al. Economic evaluation of meningococcal serogroup C conjugate vaccination programmes in The Netherlands and its impact on decision-making. *Vaccine* 2004; 23:470-9. 10.1016/j.vaccine.2004.06.019.
3. Current professional information for the pharmacist and the pharmacy team [in Dutch: Actuele vakinhoudelijke informatie voor de apotheker en het apotheketeam]. 2021 KNMP Kennisbank; Available from <https://kennisbank.knmp.nl/> Accessed October 26, 2021.
4. 2021 Zorginstituut Nederland Available from <https://www.medicijnkosten.nl/>. Accessed October 26, 2021.
5. Stoof SP, Rodenburg GD, Knol MJ, et al. Disease Burden of Invasive Meningococcal Disease in the Netherlands Between June 1999 and June 2011: A Subjective Role for Serogroup and Clonal Complex. *Clinical infectious diseases : an official publication of the Infectious Diseases Society of America* 2015; 61:1281-92. 10.1093/cid/civ506.
6. Loenenbach AD, van der Ende A, de Melker HE, et al. The Clinical Picture and Severity of Invasive Meningococcal Disease Serogroup W Compared With Other Serogroups in the Netherlands, 2015-2018. *Clinical infectious diseases : an official publication of the Infectious Diseases Society of America* 2020; 70:2036-44. 10.1093/cid/ciz578.
7. Costing manual: Methodology of costing research and reference prices for economic evaluations in healthcare [in Dutch: Kostenhandleiding: Methodologie van kostenonderzoek en referentieprijzen voor economische evaluaties in de gezondheidszorg]. 2016 Hakkaart-van Roijen, L., van der Linden, N., Bouwmans, C., Kanters, T., Tan, S.S. Institute for Medical Technology Assessment. Erasmus Universiteit Rotterdam; Available from <https://www.zorginstituutnederland.nl/over-ons/publicaties/publicatie/2016/02/29/richtlijn-voor-het-uitvoeren-van-economische-evaluaties-in-de-gezondheidszorg>. Accessed October 26, 2021.
8. Pouwels KB, Hak E, van der Ende A, et al. Cost-effectiveness of vaccination against meningococcal B among Dutch infants: Crucial impact of changes in incidence. *Hum Vaccin Immunother* 2013; 9:1129-38. 10.4161/hv.23888.
9. Beck E, Klint J, Neine M, et al. Cost-Effectiveness of 4CMenB Infant Vaccination in England: A Comprehensive Valuation Considering the Broad Impact of Serogroup B Invasive Meningococcal Disease. *Value Health* 2021; 24:91-104. 10.1016/j.jval.2020.09.004.
10. Severens JL, Brokx JP, van den Broek P. Cost analysis of cochlear implants in deaf children in The Netherlands. *Am J Otol* 1997; 18:714-8
11. Linssen AM, Anteunis LJ, Joore MA. The Cost-Effectiveness of Different Hearing Screening Strategies for 50- to 70-Year-Old Adults: A Markov Model. *Value Health* 2015; 18:560-9. 10.1016/j.jval.2015.03.1789.
12. Scholz S, Koerber F, Meszaros K, et al. The cost-of-illness for invasive meningococcal disease caused by serogroup B Neisseria meningitidis (MenB) in Germany. *Vaccine* 2019; 37:1692-701. 10.1016/j.vaccine.2019.01.013.
13. Rodrigues FMP, Marlow R, Simões MJ, et al. Association of Use of a Meningococcus Group B Vaccine With Group B Invasive Meningococcal Disease Among Children in Portugal. *Jama* 2020; 324:2187-94. 10.1001/jama.2020.20449.
14. Olesen J, Gustavsson A, Svensson M, et al. The economic cost of brain disorders in Europe. *Eur J Neurol* 2012; 19:155-62. 10.1111/j.1468-1331.2011.03590.x.
15. Beecham J, Chadwick O, Fidan D, et al. Children with severe learning disabilities: needs, services and costs. *Children & Society* 2002; 16:168-81. <https://doi.org/10.1002/chi.690>. 2021/11/03

16. Wright C, Wordworth R, Glennie L. Counting the cost of meningococcal disease : scenarios of severe meningitis and septicemia. *Paediatr Drugs* 2013; 15:49-58. 10.1007/s40272-012-0006-0.
17. Bos JM, Rümke HC, Welte R, et al. Health economics of a hexavalent meningococcal outer-membrane vesicle vaccine in children: potential impact of introduction in the Dutch vaccination program. *Vaccine* 2001; 20:202-7. 10.1016/s0264-410x(01)00254-7.
18. Visser K, de Vries SO, Kitslaar PJ, et al. Cost-effectiveness of diagnostic imaging work-up and treatment for patients with intermittent claudication in The Netherlands. *Eur J Vasc Endovasc Surg* 2003; 25:213-23. 10.1053/ejvs.2002.1838.
19. Wijnen BFM, Schat SL, de Kinderen RJA, et al. Burden of disease of people with epilepsy during an optimized diagnostic trajectory: costs and quality of life. *Epilepsy Res* 2018; 146:87-93. 10.1016/j.eplepsyres.2018.07.024.
20. Buysse CM, Raat H, Hazelzet JA, et al. Long-term health status in childhood survivors of meningococcal septic shock. *Arch Pediatr Adolesc Med* 2008; 162:1036-41. 10.1001/archpedi.162.11.1036.
21. Vekeman F, Magestro M, Karner P, et al. Kidney involvement in tuberous sclerosis complex: the impact on healthcare resource use and costs. *J Med Econ* 2015; 18:1060-70. 10.3111/13696998.2015.1075995.
22. van der Kolk A, Bouwmans CA, Schawo SJ, et al. Association between societal costs and treatment response in children and adolescents with ADHD and their parents. A cross-sectional study in the Netherlands. *Springerplus* 2015; 4:224-. 10.1186/s40064-015-0978-7.
23. Bodden DHM, Dirksen CD, Bögels SM. Societal burden of clinically anxious youth referred for treatment: a cost-of-illness study. *J Abnorm Child Psychol* 2008; 36:487-97. 10.1007/s10802-007-9194-4.
24. Richtlijn: Angst (2016). 2016 Nederlands Centrum Jeugdgezondheid; Available from <https://www.ncj.nl/richtlijnen/alle-richtlijnen/richtlijn/?richtlijn=34&rlpag=1695>. Accessed November 3, 2021.
25. Depressie en andere stemmingsstoornissen. 2021 Volksgezondheidszorg.info; Available from <https://www.volksgezondheidszorg.info/onderwerp/depressie-en-andere-stemmingsstoornissen>. Accessed November 3, 2021.
26. Smit F, Cuijpers P, Oostenbrink J, et al. Costs of nine common mental disorders: implications for curative and preventive psychiatry. *J Ment Health Policy Econ* 2006; 9:193-200
27. Bosmans JE, de Bruijne MC, de Boer MR, et al. Health care costs of depression in primary care patients in The Netherlands. *Fam Pract* 2010; 27:542-8. 10.1093/fampra/cm033.
28. Regeling aanvullende bekostiging. 2021 eduVIP; Available from <https://www.eduvip.nl/regeling-aanvullende-bekostiging/>. Accessed October 27, 2021.
29. Nieuwe versies bekostigingen (v)so, residentiële leerlingen, swv po en vo, kosten kortdurend verblijf, spelregels en toelichting Kijkdozen. 2020 Steunpunt Passend Onderwijs; Available from <https://www.steunpuntpassendonderwijs-povo.nl/nieuwe-versies-bekostigingen-vso-residentiele-leerlingen-swv-po-en-vo-kosten-kortdurend-verblijf-spelregels-en-toelichting-kijkdozen/>. Accessed October 27, 2021.
30. Participation. Figures&Context. Labour Participation [in Dutch: Participatie. Cijfers&Context. Arbeidsparticipatie] 2021 Volksgezondheidszorg.info; Available from <https://www.steunpuntpassendonderwijs-povo.nl/wp-content/uploads/2021/12/Kosten-kortdurend-verblijf-leerling-VSO-school-1-jan.-2022-tm-31-juli-2022.pdf>. Accessed October 26, 2021 - The webpage has since been updated and values used are no longer shown under the updated link.
31. CBS. Average age of first-time mothers up to 29.9 years (in Dutch: Leeftijd moeder bij eerste kind stijgt naar 29,9 jaar). 2019; Available from <https://www.cbs.nl/nl-nl/nieuws/2019/19/leeftijd-moeder-bij-eerste-kind-stijgt-naar-29-9-jaar>. Accessed October 26, 2021.
32. Bénard S, Wright C, Voisine J, et al. Lifetime cost of meningococcal disease in France: Scenarios of severe meningitis and septicemia with purpura fulminans. *Journal of infection and public health* 2016; 9:339-47

33. Participation. Figures&Context. Informal care [in Dutch: Participatie. Cijfers&Context. Mantelzorg] 2021 Volksgezondheidszorg.info; Available from <https://www.volksgezondheidszorg.info/onderwerp/participatie/cijfers-context/mantelzorg#!node-mantelzorgers-naar-geslacht>. Accessed November 3, 2021.
